# Supplementary material
Source: PubMed Central journal article supplement (PMC4321278)
Supplement: pnas.201418264SI.pdf [file pnas.201418264SI.pdf]

# Supporting Information

Shenhar-Tsarfaty et al. 10.1073/pnas.1418264112

## SI Materials and Methods

**Measures.** The questionnaire covered background, occupational, psychological, and physical morbidity factors. The respondent's score on each of the indexes was obtained by computing the mean of his or her responses to the items in the index. Means and SDs for the indexes are presented in Tables 1 and 2.

**Statistics.** Given the multiple components involved we selected the decision tree support tool (1) and PLS analysis (2) to identify those parameters that are the major contributors to residual pulse (the additional pulse compared with that predicted according to age, sex, and BMI). The resultant regression tree is a hierarchical plot presented as a tree-like model (Figs. 1A and 2A) and highlights parameters that emerged as highly significant predictors of residual pulse. The tree model further offers subdivision of the remaining cohort into "branches" based on the calculated cut-point value of each continuous parameter. The same procedure was done in Fig. 2, where the annual change of calculated residual difference from predicted value (delta-pulse rest) served as the dependent variable.

The explanatory variables were sex, BMI, blood pressure, fitness data, medical history, medication, smoking, waist to hip ratio, sport intensity, inflammatory profile, and psychological scores [Patient Health Questionnaire (PHQ), Shirom-Melamed Burnout Measures (SMBM)], vigor, anxiety, FOT, and perceived control over one's life.

Multivariate data often contain systematic variation that is unrelated to the studied responses and may interfere with predictions based on the analyzed data. To remove such undesirable systematic variation in the data, we used PLS analysis to filter the input signals and achieve a better quantitative relationship between the descriptor and response matrices. Cross-validation was performed to avoid an overfitting situation.

More specifically, FOT was assessed by three items ("Nowadays, I worry about my personal safety." "Nowadays, I feel heightened tension when I am in crowded places." "I am afraid of a terror strike harming me or my family.") (3). For each item, participants checked off one of the following responses: "not at all," "a little bit," "moderately," "quite a bit," and "extremely." The scores on these items were averaged to yield a continuous FOT score (range, 1–5).

Perceived control included items assessing the two major dimensions of control, decision authority and skill discretion, similar to those of the job content questionnaire's decision authority scale (4). It was scored high for participants who reported that they were able to use their initiative and had opportunities to decide how best to use their skills. Sample items are, "My opinions and suggestions influence what happens at work"; "My job enables me to make decisions on my own and to follow them through"; and "I am free to determine how to perform my work."

- Breiman L, Friedman J, Stone CJ, Olshen RA (1984) *Classification and Regression Trees* Wadsworth Statistics/Probability (Chapman and Hall/CRC, Belmont, MA).
- Bylesjö M, et al. (2007) Orthogonal projections to latent structures as a strategy for microarray data normalization. *BMC Bioinformatics* 8:207.
- Melamed S, Shirom A, Toker S, Berliner S, Shapira I (2004) Association of fear of terror with low-grade inflammation among apparently healthy employed adults. *Psychosom Med* 66(4):484–491.

- Karasek R, Theorell T (1990) *Healthy Work: Stress, Productivity, and the Reconstruction of Working Life* (Basic Books, New York).

**Table S1. Population characteristics**

| Variable                        | Men (n = 10,972) | Women (n = 6,408) | P      |
|---------------------------------|------------------|-------------------|--------|
| <b>Risk factors</b>             |                  |                   |        |
| Age, y (SD)                     | 44.5 (11.3)      | 45.1 (10.8)       | <0.001 |
| BMI, kg/m <sup>2</sup>          | 26.9 (3.8)       | 25.5 (4.9)        | <0.001 |
| Current smokers (%)             | 16.3             | 18.3              | 0.001  |
| Diabetes (%)                    | 3.8              | 3.1               | 0.018  |
| Hyperlipidemia (%)              | 17.6             | 15.8              | 0.03   |
| Hypertension (%)                | 42.8             | 27.3              | <0.001 |
| Systolic blood pressure, mm Hg  | 124.6 (14.7)     | 117.3 (16.1)      | <0.001 |
| Diastolic blood pressure, mm Hg | 78.4 (8.4)       | 74.2 (8.2)        | <0.001 |
| Pulse, beats/min                | 69.8 (12.1)      | 72.7 (11.3)       | <0.001 |
| <b>Inflammatory biomarkers</b>  |                  |                   |        |
| hs-CRP, mg/L (SD)               | 2.5 (3.9)        | 3.4 (5.2)         | <0.001 |
| ESR, mm/H (SD)                  | 10.7 (8.0)       | 19.5 (10.4)       | <0.001 |
| Fibrinogen, g/dL (SD)           | 285.2 (59)       | 313.3 (60.1)      | <0.001 |
| WBCC, 10 <sup>3</sup> /μL (SD)  | 6.8 (1.7)        | 6.8 (1.8)         | 0.699  |
| <b>Medications</b>              |                  |                   |        |
| Acetylsalicylic acid, %         | 8.3              | 3.6               | <0.001 |
| β-Blockers, %                   | 5.4              | 4.8               | 0.099  |
| Diuretics, %                    | 2.7              | 2.3               | 0.116  |
| ACE inhibitors, %               | 4.7              | 2.4               | <0.001 |
| HMG-CoA reductase inhibitors, % | 11.0             | 7.8               | <0.001 |
| Hypoglycemic (oral) %           | 2.4              | 1.4               | <0.001 |
| Antidepressants %               | 1.2              | 1.9               | <0.001 |

ACE, angiotensin-converting enzyme; HMG-CoA, 3-hydroxy-3-methylglutarylcoenzyme A; WBCC, white blood cell count.

**Table S2. Population statistics of full variables list**

| Variable                                                | Mean or %            | SD      |
|---------------------------------------------------------|----------------------|---------|
| Sex, male                                               | 63.3                 |         |
| Age, y                                                  | 44.5                 | 11.03   |
| Religion (% Jews)                                       | 98.9                 |         |
| Tradition (% secular, traditional, religious, orthodox) | 67.8, 24.3, 7.2, 0.7 |         |
| Marital status (% married)                              | 76.6                 |         |
| Education years                                         | 15.4                 | 2.9     |
| No. of children                                         | 2.5                  | 1.25    |
| No. of children living with you                         | 1.9                  | 1.25    |
| City of birth                                           | NA                   |         |
| Father/Mother city of birth                             | NA                   |         |
| Address                                                 | NA                   |         |
| Height, m                                               | 1.7                  | 0.09    |
| Weight, kg                                              | 77.26                | 15.2    |
| Waist, cm                                               | 90.7                 | 12.7    |
| Thigh, cm                                               | 97.0                 | 8.3     |
| Body temperature, °C                                    | 36.4                 | 0.37    |
| Ergometric test                                         | NA                   |         |
| Fitness scale                                           | NA                   |         |
| Fitness %                                               | 89.2                 | 11.6    |
| Basal heart rate (pulse), beats per min                 | 70.8                 | 12.0    |
| Diastolic blood pressure, mmHg                          | 76.9                 | 8.7     |
| Systolic blood pressure, mmHg                           | 122.0                | 15.5    |
| METS                                                    | 11.8                 | 3.2     |
| METS-tool                                               | NA                   |         |
| Spirometry test scale                                   | NA                   |         |
| Spirometry indication                                   | NA                   |         |
| Spirometry severity                                     | NA                   |         |
| Forced vital capacity (FVC)                             | 101.9                | 18.8    |
| Forced expiratory volume in 1 s (FEV1)                  | 99.2                 | 15.5    |
| FEV1/FVC ratio                                          | 101.6                | 10.5    |
| Ergometry testing                                       | NA                   |         |
| Ergometry test duration, min                            | 9.83                 | 2.9     |
| Ergometry test recovery, min                            | 5.5                  | 5.8     |
| Ergometry test pulse peak, beats per min                | 162.3                | 12.5    |
| Ergometry test recovery pulse                           | 90.8                 | 11.7    |
| Hemoglobin A1C, %                                       | 5.4                  | 0.64    |
| CRP, wide range, mg/L                                   | 2.87                 | 5.03    |
| CRP, high sensitive, mg/L                               | 2.8                  | 4.5     |
| Troponin, ng/mL                                         | 2.28                 | 3.4     |
| Creatinine, mg/dL                                       | 95.1                 | 85.1    |
| ESR, mm/h                                               | 14.1                 | 10.0    |
| Fibrinogen, mg/dL                                       | 295.0                | 60.7    |
| Creatinine albumin ratio                                | 0.1169               | 9.93    |
| Microalbumin, mg/L                                      | 12.2                 | 72.0    |
| Urine gravity                                           | 1.01                 | 0.00776 |
| Urine pH                                                | 6.2                  | 0.85    |
| Red blood cells (RBC)                                   | 4.78                 | 0.45    |
| Hemoglobin, g/dL                                        | 14.3                 | 1.3     |
| Hematocrit, %                                           | 41.8                 | 3.8     |
| MCV, fL                                                 | 87.5                 | 4.6     |
| MCH, picograms/cell                                     | 29.96                | 1.9     |
| MCH concentration                                       | 34.2                 | 0.9     |
| WBC, 10 <sup>3</sup> /μL                                | 6.83                 | 1.7     |
| Neutrophils, %                                          | 59.0                 | 7.8     |
| Neutrophils total                                       | 4.1                  | 1.3     |
| Eosinophils, %                                          | 2.7                  | 1.9     |
| Basophils                                               | 0.5                  | 0.3     |
| Monocytes, %                                            | 7.5                  | 7.9     |
| Monocytes total                                         | 0.51                 | 0.2     |
| Lymphocytes, %                                          | 30.2                 | 7.0     |
| Lymphocyte total                                        | 2.0                  | 0.7     |
| Platelets, μL                                           | 250.2                | 58.7    |
| Mean platelets, fL                                      | 8.8                  | 1.0     |

**Table S2. Cont.**

| Variable                                                      | Mean or %                                                                                                                                                                                                                       | SD   |
|---------------------------------------------------------------|---------------------------------------------------------------------------------------------------------------------------------------------------------------------------------------------------------------------------------|------|
| RBC total                                                     | 4.8                                                                                                                                                                                                                             | 0.45 |
| Hemoglobin                                                    | 14.3                                                                                                                                                                                                                            | 1.3  |
| Glucose, mg/dL                                                | 92.7                                                                                                                                                                                                                            | 18.1 |
| Chloride, mEq/L                                               | 103.9                                                                                                                                                                                                                           | 2.5  |
| Sodium, mEq/L                                                 | 141.2                                                                                                                                                                                                                           | 2.6  |
| Potassium, mEq/L                                              | 4.4                                                                                                                                                                                                                             | 0.4  |
| BUN, mg/dL                                                    | 14.4                                                                                                                                                                                                                            | 3.7  |
| Serum creatinine, mg/dL                                       | 1.06                                                                                                                                                                                                                            | 0.2  |
| Serum uric acid, mg/dL                                        | 5.5                                                                                                                                                                                                                             | 1.3  |
| Total bilirubin, mg/dL                                        | 0.76                                                                                                                                                                                                                            | 0.3  |
| GPT, U/L                                                      | 25.9                                                                                                                                                                                                                            | 14.1 |
| $\gamma$ -GT, U/L                                             | 20.2                                                                                                                                                                                                                            | 19.7 |
| LDH, U/L                                                      | 309.1                                                                                                                                                                                                                           | 55.9 |
| GOTAST, U/L                                                   | 23.7                                                                                                                                                                                                                            | 8.7  |
| Serum total protein, g/L                                      | 73.8                                                                                                                                                                                                                            | 4.05 |
| Serum total albumin, g/L                                      | 45.2                                                                                                                                                                                                                            | 2.5  |
| Serum total globulin, g/L                                     | 28.6                                                                                                                                                                                                                            | 3.3  |
| Cholesterol, mg/dL                                            | 196.9                                                                                                                                                                                                                           | 37.1 |
| Triglycerides, mg/dL                                          | 118.3                                                                                                                                                                                                                           | 73.0 |
| High-density cholesterol, mg/dL                               | 55.1                                                                                                                                                                                                                            | 14.1 |
| Low-density cholesterol, mg/dL                                | 118.5                                                                                                                                                                                                                           | 31.7 |
| Cholesterol/high-density lipoprotein ratio                    | 3.76                                                                                                                                                                                                                            | 1.2  |
| Alkaline, U/L                                                 | 61.0                                                                                                                                                                                                                            | 18.4 |
| Medication                                                    | Use of medication was recorded according to 42 medication-families including statins, $\alpha$ -, $\beta$ -, and calcium blockers, diuretics, fibrates, anti-PVD, antipsychotic, antihistamine, laxative, bronchodilators, etc. |      |
| S/P diseases                                                  | Cardiovascular disease (CVD), hypertension, CVA, diabetes, cancer, ulcer, kidney stones, intestinal disease, neurological disease, chronic pain, dyslipidemia, PVD, chronic fatigue, etc.                                       |      |
| S/P family diseases                                           | Father/mother/brother CVA, CVD, dyslipidemia, hypertension were recorded                                                                                                                                                        |      |
| Hospitalization                                               | Hospitalization during last year was logged                                                                                                                                                                                     |      |
| Sport, % yes                                                  | 62.8                                                                                                                                                                                                                            |      |
| Sport kind                                                    | NA                                                                                                                                                                                                                              |      |
| Sport hours                                                   | 0.8                                                                                                                                                                                                                             | 0.8  |
| Sport d/wk                                                    | 1.9                                                                                                                                                                                                                             | 1.8  |
| Fruits/2 d                                                    | 2.7                                                                                                                                                                                                                             | 2.3  |
| Vegetables/2 d                                                | 3.5                                                                                                                                                                                                                             | 2.6  |
| Fry food                                                      | 1.0                                                                                                                                                                                                                             | 1.15 |
| Breakfast                                                     | NA                                                                                                                                                                                                                              |      |
| Coffee (cups/d)                                               | 2.7                                                                                                                                                                                                                             | 2    |
| Vitamins (%)                                                  | 5.3                                                                                                                                                                                                                             |      |
| Fasting hours                                                 | 12.0                                                                                                                                                                                                                            | 1.64 |
| Smoke (% current, past)                                       | 16.8, 24.4                                                                                                                                                                                                                      |      |
| Count of cigarettes per day                                   | 2.3                                                                                                                                                                                                                             | 6.5  |
| Alcohol drinks                                                | 37.6                                                                                                                                                                                                                            |      |
| No. of alcohol drinks/d                                       | 1.5                                                                                                                                                                                                                             | 1.1  |
| No. days of alcohol consumption                               | 1.8                                                                                                                                                                                                                             | 1.4  |
| Sleep questionnaire (13 items)                                | 2.2                                                                                                                                                                                                                             | 0.6  |
| Subjective health questionnaire (4 items)                     | 3.7                                                                                                                                                                                                                             | 0.6  |
| Subjective life satisfaction questionnaire (6 items)          | 5.1                                                                                                                                                                                                                             | 0.98 |
| Financial strain questionnaire (6 items)                      | 1.6                                                                                                                                                                                                                             | 0.66 |
| Self-efficacy questionnaire (8 items)                         | 4.2                                                                                                                                                                                                                             | 0.61 |
| Depression PHQ questionnaire (10 items)                       | 1.3                                                                                                                                                                                                                             | 0.35 |
| Anxiety questionnaire (4 items)                               | 1.8                                                                                                                                                                                                                             | 0.8  |
| FOT questionnaire (3 items)                                   | 1.5                                                                                                                                                                                                                             | 0.7  |
| JAWS questionnaire (10 items)                                 | 3.4                                                                                                                                                                                                                             | 0.75 |
| Current work description and details questionnaire (30 items) | NA                                                                                                                                                                                                                              |      |
